# Supplementary material for: Pharmacologic Interventions for Breathlessness in Patients With Advanced Cancer: A Systematic Review and Meta-analysis
Source: PubMed Central journal article supplement (PMC7907959; doi:10.1001/jamanetworkopen.2020.37632), 2021-02-25
Supplement: jamanetwopen-e2037632-s001.pdf [file jamanetwopen-e2037632-s001.pdf]

## Supplementary Online Content

Feliciano JL, Waldfogel JM, Sharma R, et al. Pharmacologic interventions for breathlessness in patients with advanced cancer: a systematic review and meta-analysis. *JAMA Netw Open*. 2021;4(2):e2037632. doi:10.1001/jamanetworkopen.2020.37632

### **eAppendix.** Methods Details

**eTable 1.** Definitions of the Grades of Overall Strength of Evidence

**eTable 2.** Characteristics of Included Studies

**eTable 3.** Summary of Findings for the Effects of Pharmacological Interventions on Physiologic Outcomes in Patients With Advanced Cancer

**eTable 4.** List of Studies Reporting Harms and Dropouts in Studies of Pharmacological Interventions for Breathlessness in Patients With Advanced Cancer

**eTable 5.** Rate of Dropouts Due to Adverse Effects of Pharmacological Interventions for Breathlessness in Patients With Advanced Cancer

**eTable 6.** Risk of Bias of Randomized Controlled Trials (A) and Observational Studies (B) That Evaluate the Effects of Pharmacologic Interventions

**eTable 7.** Strength of Evidence of Studies That Evaluate the Effects of Pharmacologic Interventions

**eFigure 1.** Analytic Framework for Evaluating Interventions for Breathlessness in Patients wWith Advanced Cancer

**eFigure 2.** Study Search and Preferred Reporting Items for Systematic Reviews and Meta-analyses Flowchart

**eFigure 3.** Meta-analysis of the Effects of Exercise Capacity Measures in Randomized Controlled Trials Comparing Opioids With Placebo In Patients With Advanced Cancer

**eFigure 4.** Meta-analysis of the Effects of Placebo vs Opioids on Blood Pressure in Patients With Advanced Cancer in Inpatient Hospice or Palliative Care Units

**eFigure 5.** Meta-analysis of the Effects of Placebo vs Opioids on Heart Rate in Patients With Advanced Cancer in Inpatient Hospice or Palliative Care Units (Charles, 2008 et al<sup>15</sup> Saline vs Nebulized Hydromorphone Comparison)

**eFigure 6.** Meta-analysis of the Effects of Placebo vs Opioids on Heart Rate in Patients With Advanced Cancer in Inpatient Hospice or Palliative Care Units (Charles, 2008 et al<sup>15</sup> Saline vs Systemic Hydromorphone Comparison)

**eFigure 7.** Meta-analysis of the Effects of Opioids vs Opioids on Heart Rate in Patients With Advanced Cancer in Inpatient Hospice or Palliative Care Units

**eFigure 8.** Meta-analysis of the Effects of Placebo vs Opioids on Oxygen Saturation in Patients With Advanced Cancer in Inpatient Hospice or Palliative Care Units (Charles, 2008 et al<sup>15</sup> Saline vs Nebulized Hydromorphone Comparison)

**eFigure 9.** Meta-analysis of the Effects of Placebo vs Opioids on Oxygen Saturation in Patients With Advanced Cancer in Inpatient Hospice or Palliative Care Units (Charles, 2008 et al<sup>15</sup> Saline Vs Systemic Hydromorphone Comparison)

**eFigure 10.** Meta-analysis of the Effects of Opioids vs Opioids on Oxygen Saturation in Patients With Advanced Cancer in Inpatient Hospice or Palliative Care Units

**eFigure 11.** Meta-analysis of the Effects of Placebo vs Opioids on Respiratory Rates in Patients With Advanced Cancer in Inpatient Hospice or Palliative Care Units (Charles, 2008 et al<sup>15</sup> Saline vs Nebulized Hydromorphone Comparison)

**eFigure 12.** Meta-analysis of the Effects of Placebo vs Opioids on Respiratory Rates in Patients With Advanced Cancer in Inpatient Hospice or Palliative Care Units (Charles, 2008 et al<sup>15</sup> Saline vs Systemic Hydromorphone Comparison)

**eFigure 13.** Meta-analysis of the Effects of Opioids vs Opioids on Respiratory Rates in Patients With Advanced Cancer in Inpatient Hospice or Palliative Care Units

**eFigure 14.** Meta-analysis of the Effects of Placebo vs Opioids on Dizziness Outcomes in Patients With Advanced Cancer in Inpatient Hospice or Palliative Care Units

**eFigure 15.** Meta-analysis of the Effects of Placebo vs Opioids on Drowsiness Outcomes in Patients With Advanced Cancer in Inpatient Hospice or Palliative Care Units

**eFigure 16.** Meta-analysis of the Effects of Placebo vs Opioids on Fatigue Outcomes in Patients With Advanced Cancer in Inpatient Hospice or Palliative Care Units

**This supplementary material has been provided by the authors to give readers additional information about their work.**

## **eAppendix. Methods details**

### **Statistical heterogeneity**

We evaluated statistical heterogeneity among studies using an  $I^2$  statistic. We considered an  $I^2$  value greater than 50% as substantial statistical heterogeneity. When we found substantial heterogeneity, we evaluated whether quantitative synthesis was appropriate or conducted sensitivity analysis when applicable.

### **Clinically Important Difference**

Although a minimally clinically important difference (MCID) in breathlessness intensity has not been formally established, there are data available to help guide this determination. In heart failure, studies have identified a difference on the VAS between 10 and 21.1 mm as clinically significant<sup>1-3</sup>. Similarly, data for chronic refractory breathlessness and COPD suggest a difference of 10mm on the VAS or 0.8 on the Borg scale as clinically.<sup>4,5</sup> In a cancer population, data from a study of breathlessness from malignant pleural effusion suggest a difference on the VAS of 19mm is clinically significant and a population of advanced cancer patients admitted to a palliative care unit considered a difference on the NRS of 2.1 to be clinically important.<sup>6,7</sup> Given the available data, we considered a difference on the VAS of 10mm or greater as clinically meaningful.

### **Cross-over Trials**

For cross-over trials, we treated data similarly to parallel studies, using the measurement from the intervention periods and the measurements from the control periods. Where possible we used a correlation co-efficient to impute a corrected standard of error, as this method may result in slightly wider confidence intervals.<sup>8</sup>

## References

1. Pang PS, Lane KA, Tavares M, et al. Is there a clinically meaningful difference in patient reported dyspnea in acute heart failure? An analysis from URGENT Dyspnea. *Heart & lung : the journal of critical care*. 2017;46(4):300-307.
2. Ander DS, Aisiku IP, Ratcliff JJ, Todd KH, Gotsch K. Measuring the dyspnea of decompensated heart failure with a visual analog scale: how much improvement is meaningful? *Congestive heart failure (Greenwich, Conn)*. 2004;10(4):188-191.
3. Oxberry SG, Bland JM, Clark AL, Cleland JGF, Johnson MJ. Minimally clinically important difference in chronic breathlessness: Every little helps. *American Heart Journal*. 2012;164(2):229-235.
4. Johnson MJ, Bland JM, Oxberry SG, Abernethy AP, Currow DC. Clinically important differences in the intensity of chronic refractory breathlessness. *Journal of Pain and Symptom Management*. 2013;46(6):957-963.
5. Oliveira A, Machado A, Marques A. Minimal Important and Detectable Differences of Respiratory Measures in Outpatients with AECOPD(dagger). *COPD*. 2018 Oct;15(5):479-88. doi: 10.1080/15412555.2018.1537366.
6. Mishra EK, Corcoran JP, Hallifax RJ, Stradling J, Maskell NA, Rahman NM. Defining the minimal important difference for the visual analogue scale assessing dyspnea in patients with malignant pleural effusions. *PloS one*. 2015;10(4):e0123798.
7. Mercadante S, Adile C, Aielli F, et al. Personalized Goal for Dyspnea and Clinical Response in Advanced Cancer Patients. *J Pain Symptom Manage*. 2019;57(1):79-85.
8. Higgins JPT, Thomas J, Chandler J, Cumpston M, Li T, Page MJ, Welch VA (editors). Chapter 23: Including variants on randomized trials. *Cochrane Handbook for Systematic Reviews of Interventions* version 6.1 (updated September 2020). Cochrane, 2020.

**eTable 1. Definitions of the grades of overall strength of evidence**

| <b>Grade</b> | <b>Definition</b>                                                                                                                                                                                                                                                                                                                         |
|--------------|-------------------------------------------------------------------------------------------------------------------------------------------------------------------------------------------------------------------------------------------------------------------------------------------------------------------------------------------|
| High         | We are very confident that the estimate of effect lies close to the true effect for this outcome. The body of evidence has few or no deficiencies. We believe that the findings are stable (i.e., another study would not change the conclusions).                                                                                        |
| Moderate     | We are moderately confident that the estimate of effect lies close to the true effect for this outcome. The body of evidence has some deficiencies. We believe that the findings are likely to be stable, but some doubt remains.                                                                                                         |
| Low          | We have limited confidence that the estimate of effect lies close to the true effect for this outcome. The body of evidence has major or numerous deficiencies (or both). We believe that additional evidence is needed before concluding either that the findings are stable or that the estimate of effect is close to the true effect. |
| Insufficient | We have no evidence, we are unable to estimate an effect, or we have no confidence in the estimate of effect for this outcome. No evidence is available, or the body of evidence has unacceptable deficiencies, precluding reaching a conclusion.                                                                                         |

eTable 2. Characteristics of included studies

| Author, year<br>Study design                  | Participants,<br>n | Cancer type                                                                     | Setting                                      | Age          | Followup       | Breathlessness | Anxiety | Exercise capacity | HRQOL | Physiologic<br>outcomes | Risk of<br>bias  |
|-----------------------------------------------|--------------------|---------------------------------------------------------------------------------|----------------------------------------------|--------------|----------------|----------------|---------|-------------------|-------|-------------------------|------------------|
| <b>Placebo vs<br/>Anxiolytics</b>             |                    |                                                                                 |                                              |              |                |                |         |                   |       |                         |                  |
| Hardy, 2016 <sup>31</sup><br>RCT              | 73                 | Cancer (not<br>specified)                                                       | Hospital,<br>Hospice<br>(inpatient)          | Median<br>70 | 14 days        | X              | X       |                   |       |                         | Low              |
| Peoples, 2016 <sup>21</sup><br>RCT            | 379                | Lung,<br>Breast,<br>Gastrointestinal,<br>Other                                  | Oncology<br>clinic                           | 62.9-64      | 28 days        | X              | X       |                   |       |                         | Some<br>concerns |
| <b>Placebo vs<br/>Corticosteroids</b>         |                    |                                                                                 |                                              |              |                |                |         |                   |       |                         |                  |
| Hui, 2016 <sup>22</sup><br>RCT                | 41                 | NSCLC, small cell<br>lung cancer,<br>Mesothelioma, other                        | Oncology,<br>Palliative<br>care clinic       | 63           | 14 days        | X              |         |                   | X     |                         | Low              |
| <b>Placebo vs<br/>Opioids</b>                 |                    |                                                                                 |                                              |              |                |                |         |                   |       |                         |                  |
| Bruera, 1993 <sup>20</sup><br>RCT: Crossover  | 10                 | Lung (others not<br>specified)                                                  | Not reported                                 | NR           | 60<br>minutes  | X              |         |                   |       | X                       | High             |
| Charles, 2008 <sup>15</sup><br>RCT: Crossover | 20                 | Breast, Lung,<br>Mesothelioma,<br>Prostate, Renal                               | Hospice<br>(home),<br>Hospice<br>(inpatient) | 69           | 60<br>minutes  | X              |         |                   |       | X                       | High             |
| Hui, 2014 <sup>18</sup><br>RCT                | 20                 | Breast,<br>Gastrointestinal,<br>Genitourinary,<br>Gynecologic, Lung,<br>Sarcoma | Oncology<br>clinic                           | 55           | 160<br>minutes | X              |         | X                 |       | X                       | Low              |

|                                                      |     |                                                                                |                        |             |             |   |  |   |  |   |               |
|------------------------------------------------------|-----|--------------------------------------------------------------------------------|------------------------|-------------|-------------|---|--|---|--|---|---------------|
| Hui, 2016 <sup>17</sup><br>RCT                       | 24  | Breast, Gastrointestinal, Genitourinary, Gynecologic, Lung, Hematologic, Other | Palliative care clinic | 52.4        | 172 minutes | X |  | X |  | X | Low           |
| Hui, 2017 <sup>16</sup><br>RCT                       | 20  | Breast, GI, GU, Gyn, Lung, Other                                               | Palliative care clinic | 55          | 6 minutes   | X |  | X |  | X | Low           |
| Pinna, 2015 <sup>19</sup><br>RCT: Crossover          | 13  | Breast, Kidney, Lung, Stomach                                                  | Palliative care clinic | 65.2        | 7 Days      | X |  | X |  | X | Some concerns |
| <b>Opioids vs Anxiolytics</b>                        |     |                                                                                |                        |             |             |   |  |   |  |   |               |
| Navigante, 2010 <sup>25</sup><br>RCT                 | 63  | Breast, Head and neck, Lung, Other                                             | Oncology clinic        | Range 30-82 | 5 Days      | X |  |   |  | X | Some concerns |
| <b>Opioids vs Anxiolytics vs Combination</b>         |     |                                                                                |                        |             |             |   |  |   |  |   |               |
| Navigane, 2006 <sup>26</sup><br>RCT                  | 101 | Lung, Breast, Gynecologic, Sarcomas, Unknown primary, Colorectal, Other        | Hospital               | 56.9-57.8   | 48 hours    | X |  |   |  | X | High          |
| <b>Opioids vs Corticosteroids vs Bronchodilators</b> |     |                                                                                |                        |             |             |   |  |   |  |   |               |
| Tian, 2016 <sup>29</sup><br>Retrospective cohort     | 343 | Breast, Colorectal, Gastric, Lung, Other (not specified)                       | Hospital               | 53.1-54.2   | 60 minutes  | X |  |   |  | X | Serious       |
| <b>Opioids vs Opioids</b>                            |     |                                                                                |                        |             |             |   |  |   |  |   |               |
| Aabom, 2019 <sup>32</sup><br>RCT: Crossover          | 12  | Lung and non-lung                                                              | Palliative care clinic | 74.8        | 20 minutes  | X |  |   |  |   | Low           |
| Allard, 1999 <sup>28</sup>                           | 33  | Breast, Lung/Pleura, Other (not specified)                                     | Palliative care clinic | 63.3        | 240 minutes | X |  |   |  | X | Some concerns |

|                                              |    |                                                                                                                             |                                        |              |               |   |  |  |  |   |      |
|----------------------------------------------|----|-----------------------------------------------------------------------------------------------------------------------------|----------------------------------------|--------------|---------------|---|--|--|--|---|------|
| RCT                                          |    |                                                                                                                             |                                        |              |               |   |  |  |  |   |      |
| Bruera, 2005 <sup>27</sup><br>RCT: Crossover | 12 | Lung,<br>Gastrointestinal,<br>Other                                                                                         | Not reported                           | Median<br>58 | 2 days        | X |  |  |  |   | High |
| Gamborg, 2013 <sup>24</sup><br>RCT           | 20 | NR                                                                                                                          | Hospice<br>(inpatient)                 | NR           | 1 hour        | X |  |  |  | X | High |
| Hui, 2019 <sup>30</sup><br>RCT               | 30 | Breast,<br>Gastrointestinal,<br>Genitourinary,<br>Gynecological, Head<br>and neck,<br>Respiratory, Other<br>(not specified) | Oncology,<br>Palliative<br>care clinic | 52           | NR            | X |  |  |  | X | Low  |
| Simon, 2016 <sup>23</sup><br>RCT: Crossover  | 10 | Lung, Hematology,<br>Breast, Ovary,<br>Esophagus,<br>Melanoma                                                               | Inpatient                              | 58           | 60<br>minutes | X |  |  |  | X | High |

**eTable 3. Summary of findings for the effects of pharmacological interventions on physiologic outcomes in patients with advanced cancer**

| Outcome                  | Comparison                                                                                                                                                                                          | Number of Studies Reporting Outcome (N) | Findings                                                                                                                                                                                                                                                                                                                                                                                                                                                                | Conclusion                                                                                                                                       |
|--------------------------|-----------------------------------------------------------------------------------------------------------------------------------------------------------------------------------------------------|-----------------------------------------|-------------------------------------------------------------------------------------------------------------------------------------------------------------------------------------------------------------------------------------------------------------------------------------------------------------------------------------------------------------------------------------------------------------------------------------------------------------------------|--------------------------------------------------------------------------------------------------------------------------------------------------|
| <b>Blood pressure</b>    |                                                                                                                                                                                                     |                                         |                                                                                                                                                                                                                                                                                                                                                                                                                                                                         |                                                                                                                                                  |
|                          | <b>Opioid vs. placebo</b><br>Fentanyl vs. placebo (2)                                                                                                                                               | <b>2 RCTs</b><br>(N=44)                 | Pooled analysis:<br><ul style="list-style-type: none"> <li>• Diastolic, SMD: 0.243; 95% CI, -0.23 to 1.41</li> <li>• Systolic, SMD: 0.478; 95% CI, -0.13 to 1.09</li> </ul>                                                                                                                                                                                                                                                                                             | <ul style="list-style-type: none"> <li>• There was no difference between opioids and placebo in the effect on blood pressure</li> </ul>          |
|                          | <b>Opioid vs. opioid</b><br>High dose vs. low dose fentanyl                                                                                                                                         | <b>1 RCTs</b><br>(N=30)                 | <ul style="list-style-type: none"> <li>• Diastolic, difference between beginning and end of walk, calculated SMD: 0.14; 95% CI, -0.54 to 0.81</li> <li>• Systolic, difference between beginning and end of walk, calculated SMD: 0.17; 95% CI, -0.51 to 0.84</li> </ul>                                                                                                                                                                                                 | <ul style="list-style-type: none"> <li>• There was no significant change in blood pressure in patients in either arm</li> </ul>                  |
| <b>Heart rate</b>        |                                                                                                                                                                                                     |                                         |                                                                                                                                                                                                                                                                                                                                                                                                                                                                         |                                                                                                                                                  |
|                          | <b>Opioids vs. placebo</b><br>Fentanyl vs. placebo (2)<br>Hydromorphone (nebulized) vs. hydromorphone (Oral or SC) vs. placebo (nebulized) (1)                                                      | <b>3 RCTs</b><br>(N=64)                 | Pooled analysis with Charles, 2008 et al. <sup>12</sup> saline vs. nebulized hydromorphone comparison:<br><ul style="list-style-type: none"> <li>• SMD: -0.14 (95% CI: -0.57 to 0.29),</li> <li>• I-squared=0.0%, p=0.66</li> </ul><br>Pooled analysis with Charles, 2008 et al. <sup>12</sup> saline vs. systemic hydromorphone comparison:<br><ul style="list-style-type: none"> <li>• SMD: -0.03 (95% CI: -0.46 to 0.4)</li> <li>• I-squared=0.0%, p=0.46</li> </ul> | <ul style="list-style-type: none"> <li>• There was no significant difference between opioids and placebo in the effect on heart rate.</li> </ul> |
|                          | <b>Opioid vs. opioid</b><br>sublingual vs. subcutaneous morphine (1)<br>High dose vs. low dose fentanyl (1)<br>Hydromorphone (nebulized) vs. hydromorphone (Oral or SC) vs. placebo (nebulized) (1) | <b>3 RCTs</b><br>(N=75)                 | Pooled analysis:<br><ul style="list-style-type: none"> <li>• SMD: 0.11; 95% CI, -0.3 to 0.52</li> <li>• I-squared=0.0%, p=0.79</li> </ul>                                                                                                                                                                                                                                                                                                                               | <ul style="list-style-type: none"> <li>• There was no significant difference between opioids in the effect on heart rate</li> </ul>              |
| <b>Oxygen saturation</b> |                                                                                                                                                                                                     |                                         |                                                                                                                                                                                                                                                                                                                                                                                                                                                                         |                                                                                                                                                  |
|                          | <b>Opioid vs. placebo</b><br>Fentanyl vs. placebo (4)<br>Hydromorphone (nebulized) vs. hydromorphone (Oral or SC) vs. placebo (nebulized) (1)<br>Morphine vs. placebo                               | <b>6 RCTs</b><br>(N=107)                | Pooled analysis with Charles, 2008 et al. <sup>12</sup> saline vs. nebulized hydromorphone comparison:<br><ul style="list-style-type: none"> <li>• SMD: -0.07 (95% CI: -0.40 to 0.25),</li> <li>• I-squared=0.0%, p=0.65</li> </ul><br>Pooled analysis with Charles, 2008 et al. <sup>1</sup> saline vs. systemic                                                                                                                                                       | <ul style="list-style-type: none"> <li>• There was no difference between opioids and placebo in the effect on oxygen saturation.</li> </ul>      |



|                         |                                                                                                                                                                                                                                           |                             |                                                                                                                                                                                                                                                                                                                                                                                                                                                               |                                                                                                                                                    |
|-------------------------|-------------------------------------------------------------------------------------------------------------------------------------------------------------------------------------------------------------------------------------------|-----------------------------|---------------------------------------------------------------------------------------------------------------------------------------------------------------------------------------------------------------------------------------------------------------------------------------------------------------------------------------------------------------------------------------------------------------------------------------------------------------|----------------------------------------------------------------------------------------------------------------------------------------------------|
|                         | (1)                                                                                                                                                                                                                                       |                             | hydromorphone comparison: <ul style="list-style-type: none"> <li>• SMD: -0.13 (95% CI: -0.45 to 0.19)</li> <li>• I-squared=0.0%, p=0.63</li> </ul>                                                                                                                                                                                                                                                                                                            |                                                                                                                                                    |
|                         | <b>Opioid vs. opioid</b><br><br>Fentanyl vs. morphine (1)<br>High dose vs. low dose fentanyl (1)<br>Hydromorphone (nebulized) vs. hydromorphone (Oral or SC) vs. placebo (nebulized) (1)                                                  | 3 RCTs<br><br>(N=65)        | Pooled analysis: <ul style="list-style-type: none"> <li>• SMD: -0.03; 95% CI, -0.44 to 0.37</li> <li>• I-squared=0.0%, p=0.60</li> </ul>                                                                                                                                                                                                                                                                                                                      | <ul style="list-style-type: none"> <li>• There was no difference in the effect on oxygen saturation between opioids.</li> </ul>                    |
|                         | <b>Opioid vs. anxiolytics</b><br><br>Oral morphine vs. oral midazolam (1)<br>Subcutaneous morphine vs. subcutaneous midazolam vs. combination (1)                                                                                         | 2 RCTs<br><br>(N=164)       | 90 minutes (calculated SMD: 0.001, 95% CI, -0.49 to 0.5) or Day 5 (calculated SMD: -0.003, 95% CI, -0.5 to 0.49)<br><br>Second study reported no significant differences between groups. Unable to calculate SMD, no variability reported                                                                                                                                                                                                                     | <ul style="list-style-type: none"> <li>• There was no difference in the effect on oxygen saturation for opioids compared to anxiolytics</li> </ul> |
| <b>Respiratory rate</b> |                                                                                                                                                                                                                                           |                             |                                                                                                                                                                                                                                                                                                                                                                                                                                                               |                                                                                                                                                    |
|                         | Opioid vs. placebo<br><br>Fentanyl vs. placebo (3)<br>Hydromorphone (nebulized) vs. hydromorphone (Oral or subcutaneous) vs. placebo (nebulized) (1)<br>Morphine vs. placebo (1)                                                          | <b>5 RCTs</b><br><br>(N=94) | Pooled analysis with Charles, 2008 et al. <sup>12</sup> saline vs. nebulized hydromorphone comparison: <ul style="list-style-type: none"> <li>• SMD: 0.11 (95% CI: -0.25 to 0.47),</li> <li>• I-squared=0.0%, p=0.44</li> </ul> Pooled analysis with Charles, 2008 et al. <sup>12</sup> saline vs. systemic hydromorphone comparison: <ul style="list-style-type: none"> <li>• SMD: 0.05 (95% CI: -0.31 to 0.41)</li> <li>• I-squared=1.0%, p=0.40</li> </ul> | <ul style="list-style-type: none"> <li>• There was no difference between opioids and placebo in the effect on respiratory rate.</li> </ul>         |
|                         | Opioid vs. opioid<br><br>Low dose vs. high dose opioid (drug unspecified) (1)<br>Morphine vs. fentanyl (1)<br>High dose vs. low dose fentanyl (1)<br>Hydromorphone (nebulized) vs. hydromorphone (Oral or SC) vs. placebo (nebulized) (1) | <b>4 RCTs</b><br><br>(N=98) | Pooled analysis: <ul style="list-style-type: none"> <li>• SMD: -0.23 (95% CI, -0.63 to 0.18)</li> <li>• I-squared=0.0%, p=0.91</li> </ul>                                                                                                                                                                                                                                                                                                                     | <ul style="list-style-type: none"> <li>• There was no difference between opioids in the effect on respiratory rate</li> </ul>                      |

SMD: standardized mean difference, RR: relative risk, MGBD: mean between group difference; vs= versus

**eTable 4. List of studies reporting harms and dropouts in studies of pharmacological interventions for breathlessness in patients with advanced cancer**

| Author, year                                           | N   | Central nervous system | Gastro-intestinal | Pruritus | Urinary retention | Dry mouth | Dropouts |
|--------------------------------------------------------|-----|------------------------|-------------------|----------|-------------------|-----------|----------|
| <b>Opioids vs. Placebo</b>                             |     |                        |                   |          |                   |           |          |
| Hui, 2017 <sup>16</sup>                                | 20  | X                      | X                 | X        |                   |           | X        |
| Hui, 2016 <sup>17</sup>                                | 24  | X                      | X                 |          |                   |           |          |
| Hui, 2014 <sup>18</sup>                                | 20  | X                      | X                 | X        |                   |           |          |
| Pinna, 2015 <sup>19</sup>                              | 13  |                        | X                 |          |                   |           |          |
| Charles, 2008 <sup>15</sup>                            | 20  |                        |                   |          |                   |           | X        |
| <b>Anxiolytics vs. Placebo</b>                         |     |                        |                   |          |                   |           |          |
| Peoples, 2016 <sup>21</sup>                            | 379 |                        |                   |          |                   |           | X        |
| Hardy, 2016 <sup>31</sup>                              | 73  | X                      |                   |          |                   |           |          |
| <b>Placebo vs. Corticosteroids vs. Placebo</b>         |     |                        |                   |          |                   |           |          |
| Hui, 2016 <sup>22</sup>                                | 41  | X                      | X                 |          |                   |           | X        |
| <b>Opioids vs. Opioids</b>                             |     |                        |                   |          |                   |           |          |
| Kawabata, 2013 <sup>33</sup> [retro]                   | 95  | X                      | X                 | X        | X                 |           |          |
| Bruera, 2005 <sup>27</sup>                             | 12  | X                      | X                 |          |                   |           |          |
| Hui, 2019 <sup>30</sup>                                | 30  | X                      | X                 | X        |                   |           |          |
| <b>Opioids vs. Anxiolytics</b>                         |     |                        |                   |          |                   |           |          |
| Navigante, 2010 <sup>25</sup>                          | 63  | X                      | X                 | X        |                   | X         | X        |
| <b>Opioids vs. Anxiolytics vs. Combination</b>         |     |                        |                   |          |                   |           |          |
| Navigane, 2006 <sup>26</sup>                           | 101 | X                      | X                 |          |                   | X         |          |
| <b>Opioids vs. Corticosteroids vs. Bronchodilators</b> |     |                        |                   |          |                   |           |          |
| Tian, 2016 <sup>29</sup>                               | 343 | X                      | X                 |          |                   | X         |          |

N=sample size

**eTable 5. Rate of dropouts due to adverse effects of pharmacological interventions for breathlessness in patients with advanced cancer**

| Drug Class             | Intervention                | Dropouts due to adverse effects, n (%) |
|------------------------|-----------------------------|----------------------------------------|
| <b>Opioids</b>         | Fentanyl <sup>16</sup>      | 1 (9.1%)                               |
|                        | Hydromorphone <sup>15</sup> | 4 (16%)                                |
|                        | Morphine <sup>25</sup>      | 1 (3.2%)                               |
| <b>Anxiolytics</b>     | Midazolam <sup>25</sup>     | 1 (3.2%)                               |
|                        | Buspirone <sup>21</sup>     | 10 (4.7%)                              |
| <b>Corticosteroids</b> | Dexamethasone <sup>22</sup> | 1 (5.6%) – 1 (7.1%)                    |

**eTable 6a. Risk of bias of randomized controlled trials that evaluate the effects of pharmacologic interventions**

| Author, year                  | Domain 1: Randomization process | Domain 2: Deviations intended interventions (effect of assignment to intervention) | Domain 2: Deviations intended interventions (effect of adhering to intervention) | Domain 3: Missing outcome data | Domain 4: Measurement of the outcome | Domain 5: Selection of the reported result | Final Assessment |
|-------------------------------|---------------------------------|------------------------------------------------------------------------------------|----------------------------------------------------------------------------------|--------------------------------|--------------------------------------|--------------------------------------------|------------------|
| Aabom, 2019 <sup>32</sup>     | Low risk                        | Low risk                                                                           | NA                                                                               | Low risk                       | Low risk                             | Low risk                                   | Low risk         |
| Allard, 1999 <sup>28</sup>    | Some concerns                   | Low risk                                                                           | NA                                                                               | Low risk                       | Low risk                             | Low risk                                   | Some concerns    |
| Bruera, 1993 <sup>20</sup>    | Some concerns                   | Low risk                                                                           | NA                                                                               | Low risk                       | High risk                            | Low risk                                   | High risk        |
| Bruera, 2005 <sup>27</sup>    | Some concerns                   | Low risk                                                                           | NA                                                                               | Some concerns                  | Low risk                             | Some concerns                              | High risk        |
| Charles, 2008 <sup>15</sup>   | Some concerns                   | Low risk                                                                           | NA                                                                               | Low risk                       | Low risk                             | Some concerns                              | High risk        |
| Gamborg, 2013 <sup>24</sup>   | Some concerns                   | Some concerns                                                                      | NA                                                                               | Low risk                       | Some concerns                        | Low risk                                   | High risk        |
| Hardy, 2016 <sup>31</sup>     | Low risk                        | Low risk                                                                           | NA                                                                               | Low risk                       | Low risk                             | Low risk                                   | Low risk         |
| Hui, 2014 <sup>18</sup>       | Low risk                        | Low risk                                                                           | NA                                                                               | Low risk                       | Low risk                             | Low risk                                   | Low risk         |
| Hui, 2016 <sup>17</sup>       | Low risk                        | Low risk                                                                           | NA                                                                               | Low risk                       | Low risk                             | Low risk                                   | Low risk         |
| Hui, 2016 <sup>22</sup>       | Low risk                        | Low risk                                                                           | NA                                                                               | Low risk                       | Low risk                             | Low risk                                   | Low risk         |
| Hui, 2017 <sup>16</sup>       | Low risk                        | Low risk                                                                           | NA                                                                               | Low risk                       | Low risk                             | Low risk                                   | Low risk         |
| Hui, 2019 <sup>30</sup>       | Low risk                        | Low risk                                                                           | NA                                                                               | Low risk                       | Low risk                             | Low risk                                   | Low risk         |
| Navigante, 2006 <sup>26</sup> | Low risk                        | Some concerns                                                                      | NA                                                                               | Low risk                       | Some concerns                        | Some concerns                              | High risk        |
| Navigante, 2010 <sup>25</sup> | Low risk                        | Some concerns                                                                      | NA                                                                               | Low risk                       | Some concerns                        | Some concerns                              | Some concerns    |

|                             |               |          |    |               |           |           |               |
|-----------------------------|---------------|----------|----|---------------|-----------|-----------|---------------|
| Peoples, 2016 <sup>21</sup> | Low risk      | Low risk | NA | Some concerns | Low risk  | Low risk  | Some concerns |
| Pinna, 2015 <sup>19</sup>   | Some concerns | Low risk | NA | Low risk      | Low risk  | Low risk  | Some concerns |
| Simon, 2016 <sup>23</sup>   | Some concerns | Low risk | NA | Some concerns | High risk | High risk | High risk     |

**eTable 6b. Risk of bias of observational studies that evaluate the effects of pharmacologic interventions**

| <b>Author, year</b>             | <b>Domain 1:<br/>Confounding</b> | <b>Domain 2:<br/>Patient<br/>Selection</b> | <b>Domain 3:<br/>Classifying<br/>Interventions</b> | <b>Domain 4:<br/>Deviations from<br/>intended<br/>interventions</b> | <b>Domain 5:<br/>Missing<br/>data</b> | <b>Domain 6:<br/>Measurement of<br/>outcomes</b> | <b>Domain 7:<br/>Selection of<br/>reported<br/>results</b> | <b>Overall<br/>Assessment</b> |
|---------------------------------|----------------------------------|--------------------------------------------|----------------------------------------------------|---------------------------------------------------------------------|---------------------------------------|--------------------------------------------------|------------------------------------------------------------|-------------------------------|
| Kawabata,<br>2013 <sup>33</sup> | Critical                         | Serious                                    | Low                                                | No information                                                      | Moderate                              | Moderate                                         | Serious                                                    | Critical                      |
| Tian, 2016 <sup>29</sup>        | Serious                          | Moderate                                   | Low                                                | Moderate                                                            | Moderate                              | Moderate                                         | Serious                                                    | Serious                       |

**eTable 7. Strength of evidence of studies that evaluate the effects of pharmacologic interventions**

| Key Outcome                    | Intervention                                  | Number of studies (participants)          | Study limitations | Directness | Consistency  | Precision | Reporting bias | Strength of evidence |
|--------------------------------|-----------------------------------------------|-------------------------------------------|-------------------|------------|--------------|-----------|----------------|----------------------|
| Breathlessness                 | Opioids vs Placebo                            | 6 RCT (107 participants)                  | Low               | Direct     | Consistent   | Precise   | Undetected     | Moderate             |
| Breathlessness                 | Anxiolytics vs Placebo                        | 2 RCT (452 participants)                  | Medium            | Direct     | Consistent   | Imprecise | Undetected     | Low                  |
| Breathlessness                 | Corticosteroids vs Placebo                    | 1 RCT (41 participants)                   | Low               | Direct     | Unknown      | Imprecise | Suspected      | Insufficient         |
| Breathlessness                 | Opioids vs Opioids                            | 7 RCT (142 participants)                  | High              | Direct     | Consistent   | Imprecise | Suspected      | Low                  |
| Breathlessness                 | Opioids vs Anxiolytics                        | 2 RCT (164 participants)                  | Medium            | Direct     | Inconsistent | Imprecise | Suspected      | Low                  |
| Breathlessness                 | Opioids vs Corticosteroids vs Bronchodilators | 1 retrospective cohort (343 participants) | High              | Direct     | Unknown      | Imprecise | Suspected      | Insufficient         |
| Anxiety                        | Anxiolytics vs Placebo                        | 2 RCT (452 participants)                  | Medium            | Direct     | Consistent   | Precise   | Undetected     | Low                  |
| Health-related quality of life | Corticosteroids vs Placebo                    | 1 RCT (41 participants)                   | Low               | Direct     | Unknown      | Imprecise | Suspected      | Insufficient         |
| Exercise capacity              | Opioids vs Placebo                            | 4 RCT (77 participants)                   | Low               | Direct     | Consistent   | Precise   | Undetected     | Moderate             |

RCT=randomized clinical trial

eFigure 1. Analytic Framework for Evaluating Interventions for Breathlessness in Patients with Advanced Cancer

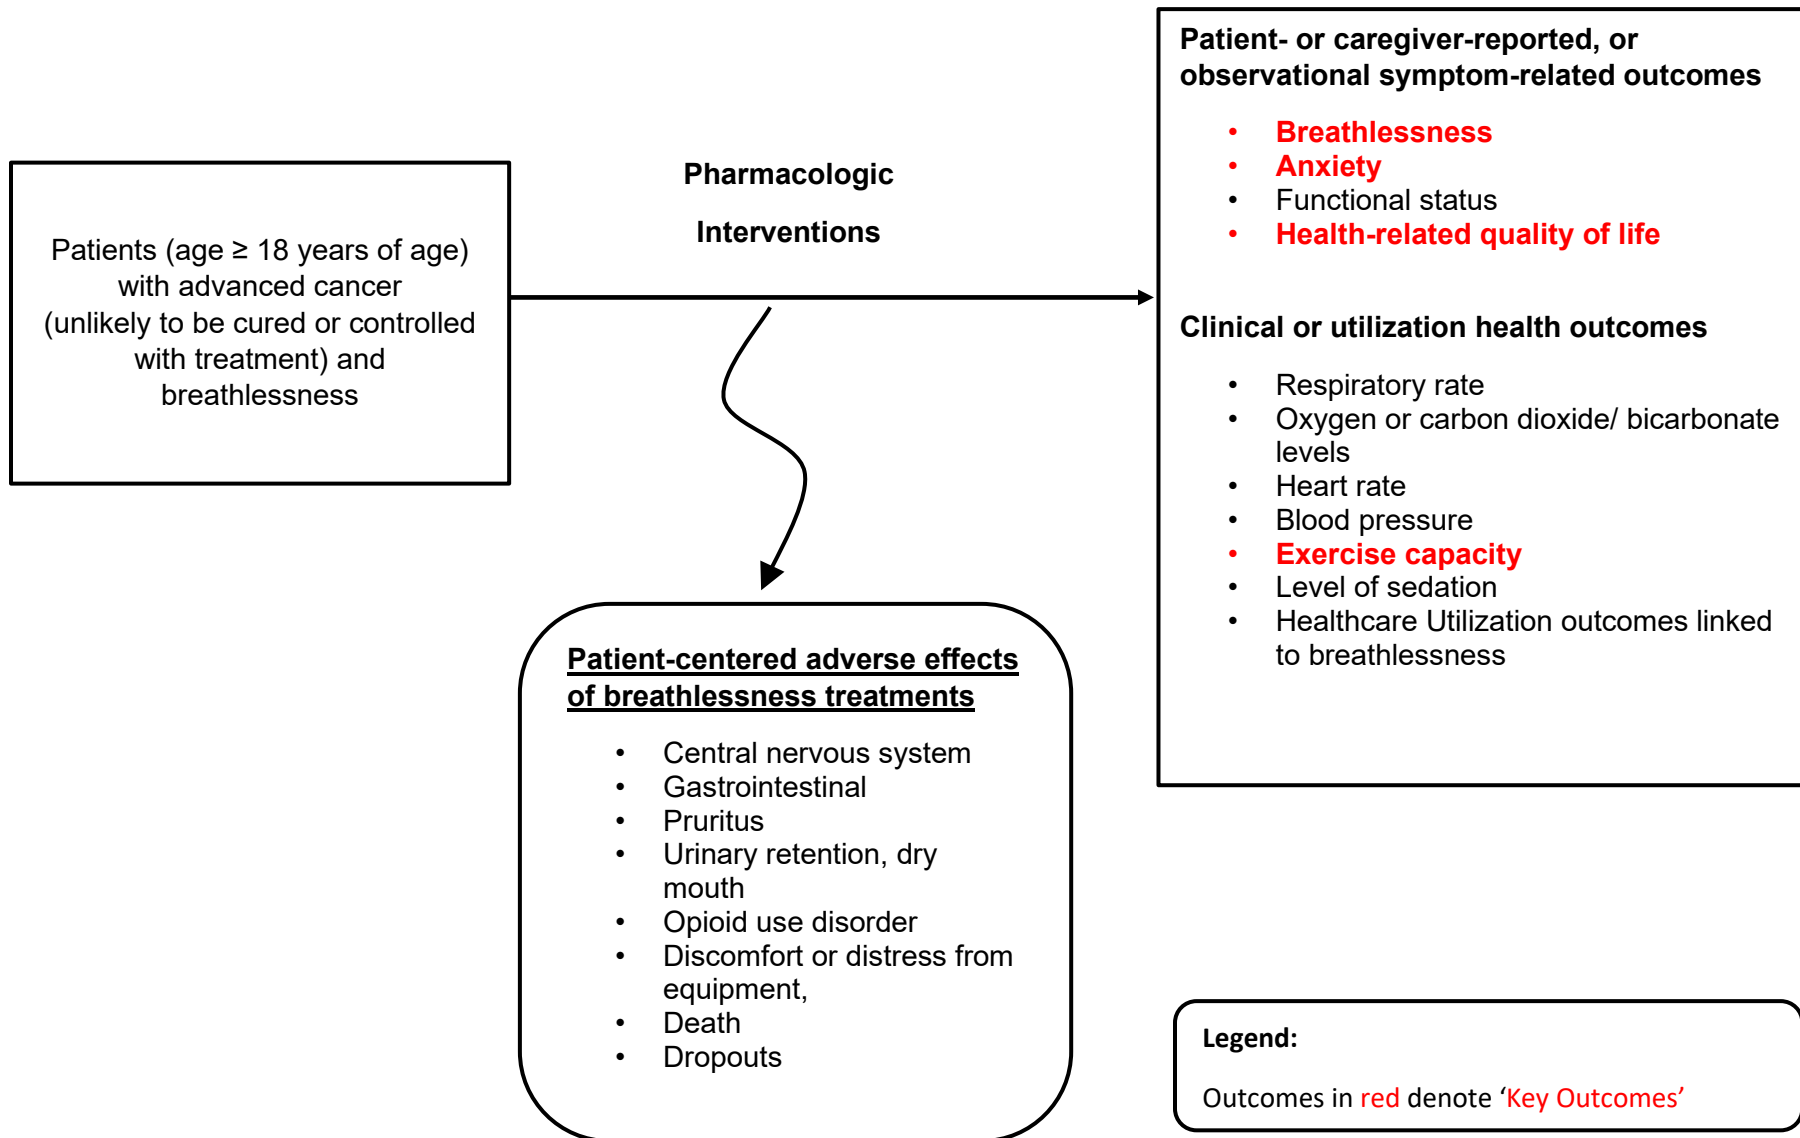



**eFigure 2.** Study Search and Preferred Reporting Items for Systematic Reviews and Meta-analyses Flowchart

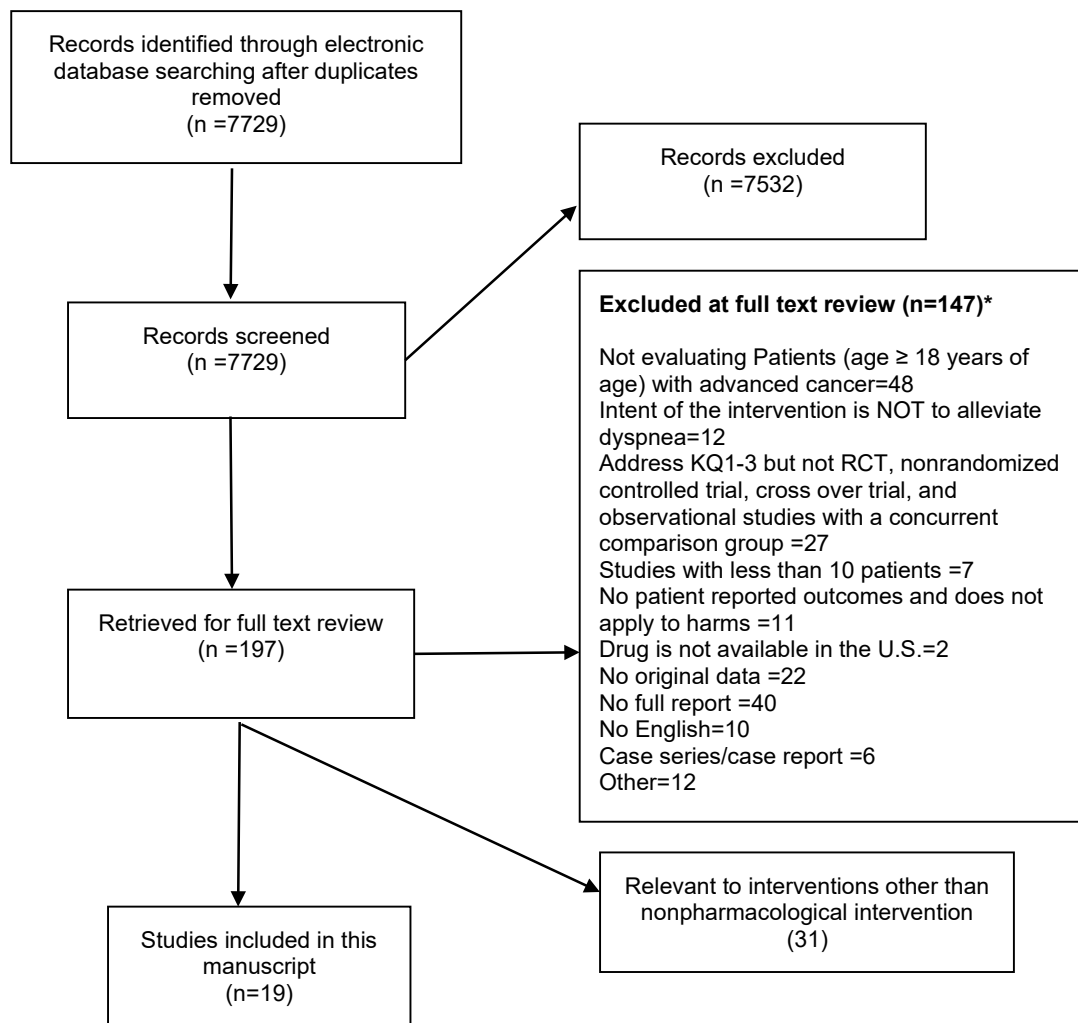

\* Total exceeds the number of citations in the exclusion box, because citations could be excluded for more than one reason

**eFigure 3. Meta-analysis of the effects on exercise capacity measures in randomized controlled trials comparing opioids with placebo in patients with advanced cancer**

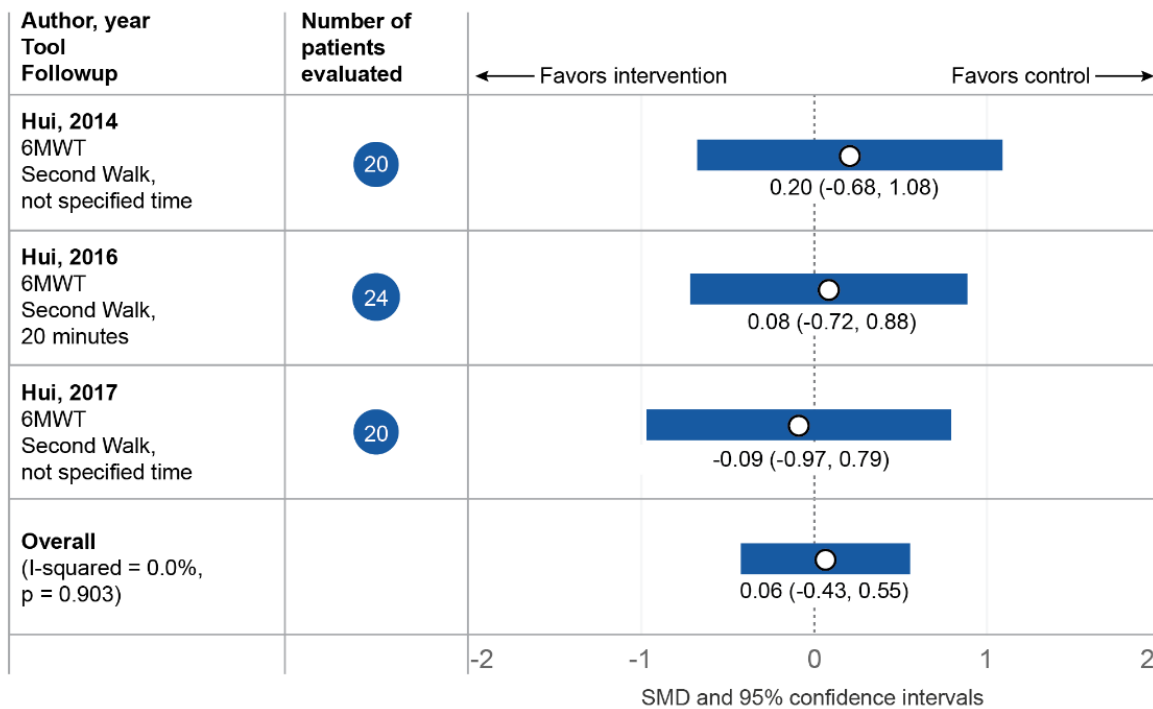

Blue dot size=corresponds to study size, Blue diamond=the result when all the individual studies are combined and averaged  
Length of the bar=corresponds to range of confidence interval.

**eFigure 4. Meta-analysis of the effects of placebo vs opioids on blood pressure in patients with advanced cancer in inpatient hospice or palliative care units**

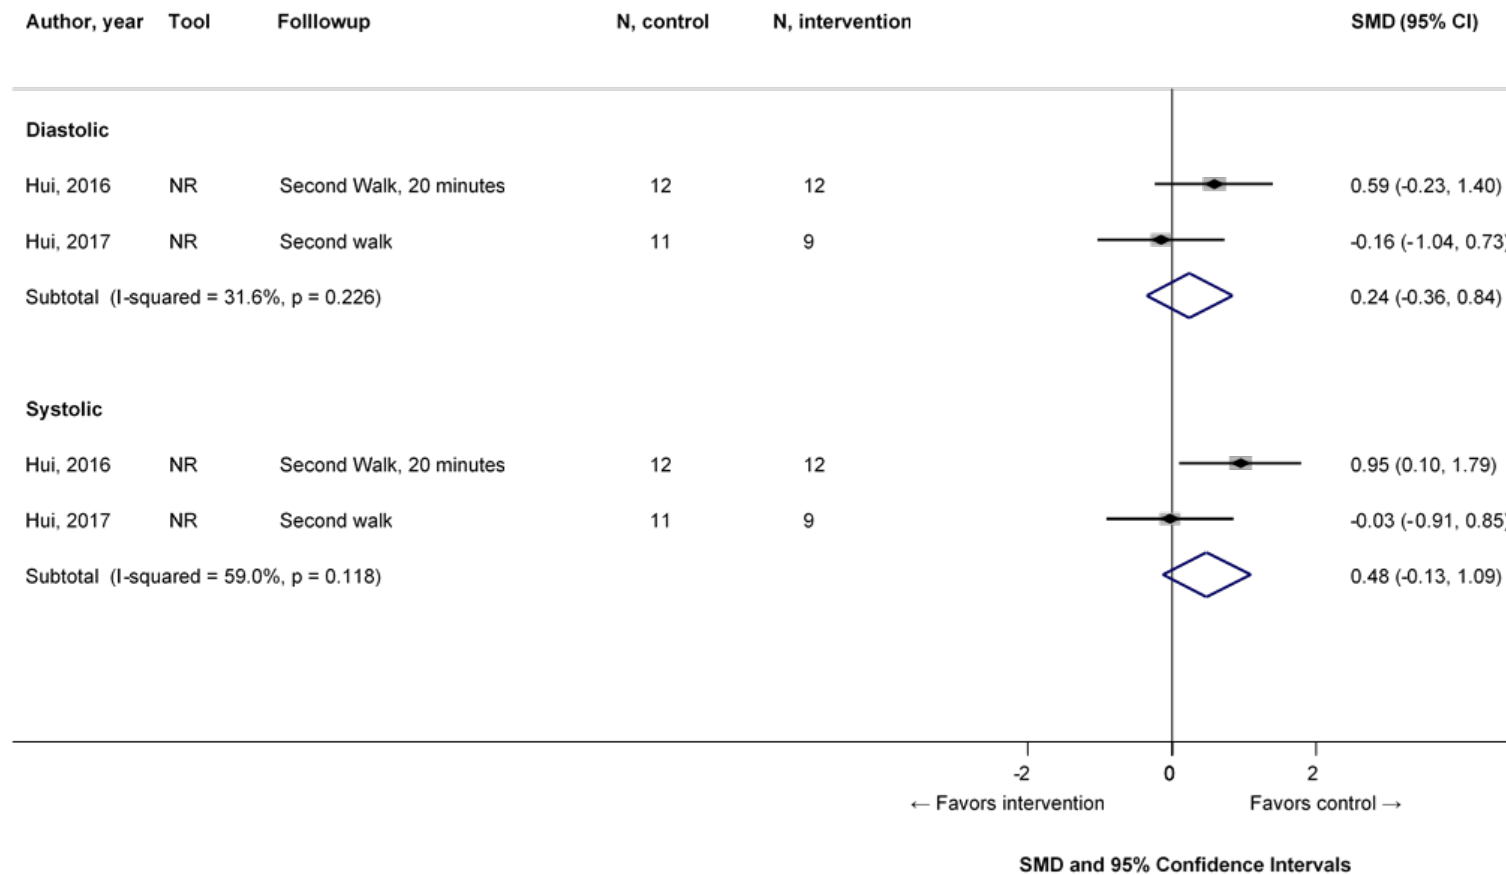

CI=confidence interval; N=sample size; NR=not reported; SMD=standardized mean difference

**eFigure 5. Meta-analysis of the effects of placebo vs opioids on heart rate in patients with advanced cancer in inpatient hospice or palliative care units (Charles, 2008 et al.<sup>15</sup> saline vs nebulized hydromorphone comparison)**

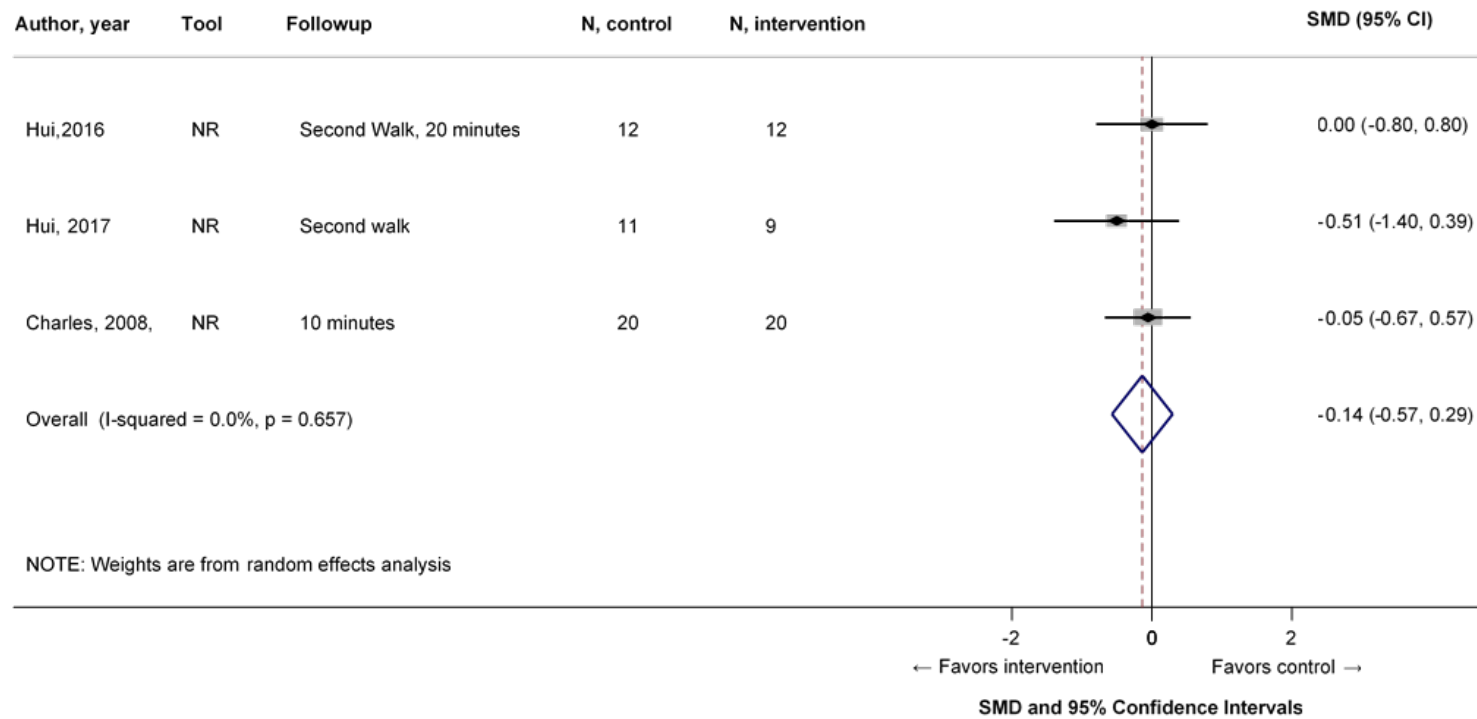

CI=confidence interval; N=sample size; NR=not reported; SMD=standardized mean difference

**eFigure 6. Meta-analysis of the effects of placebo vs opioids on heart rate in patients with advanced cancer in inpatient hospice or palliative care units (Charles, 2008 et al.<sup>15</sup> saline vs systemic hydromorphone comparison)**

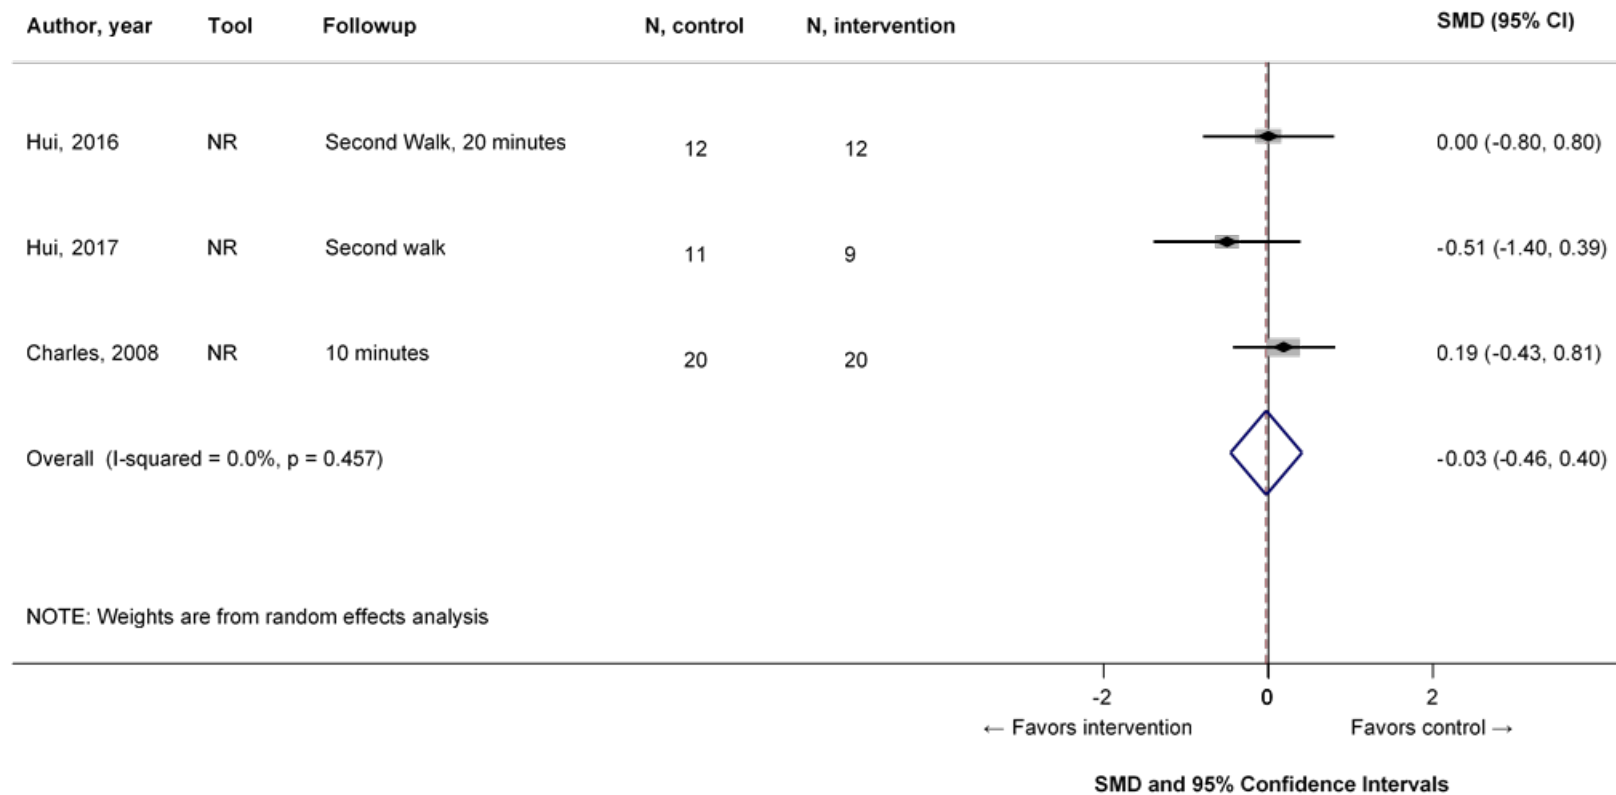

NOTE: Weights are from random effects analysis

CI=confidence interval; N=sample size; NR=not reported; SMD=standardized mean difference

**eFigure 7. Meta-analysis of the effects of opioids vs opioids on heart rate in patients with advanced cancer in inpatient hospice or palliative care units**

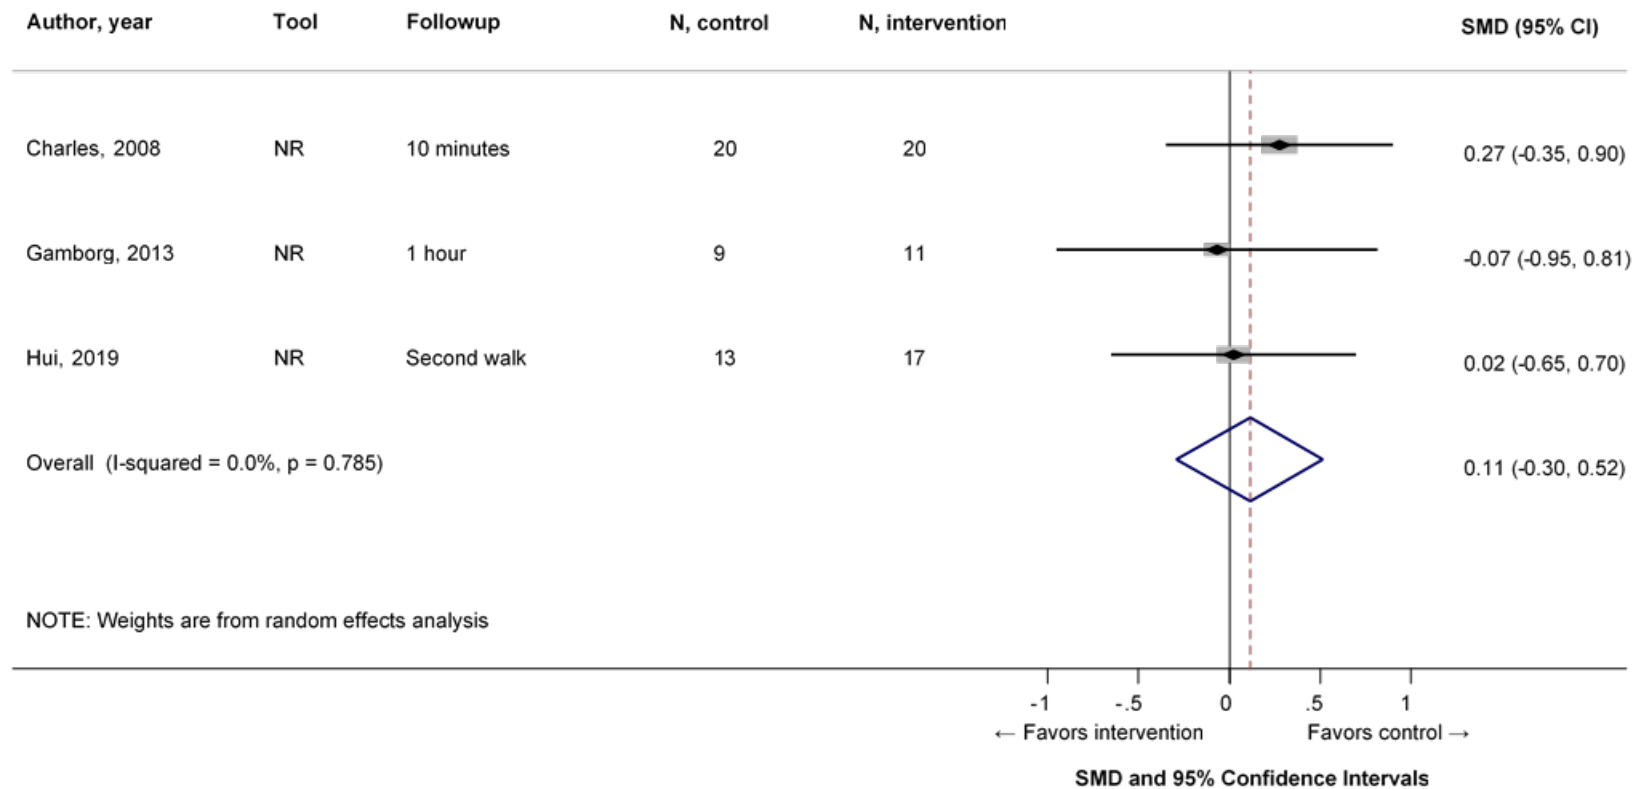

NOTE: Weights are from random effects analysis

CI=confidence interval; N=sample size; NR=not reported; SMD=standardized mean difference

**eFigure 8. Meta-analysis of the effects of placebo vs opioids on oxygen saturation in patients with advanced cancer in inpatient hospice or palliative care units (Charles, 2008 et al.<sup>15</sup> saline vs nebulized hydromorphone comparison)**

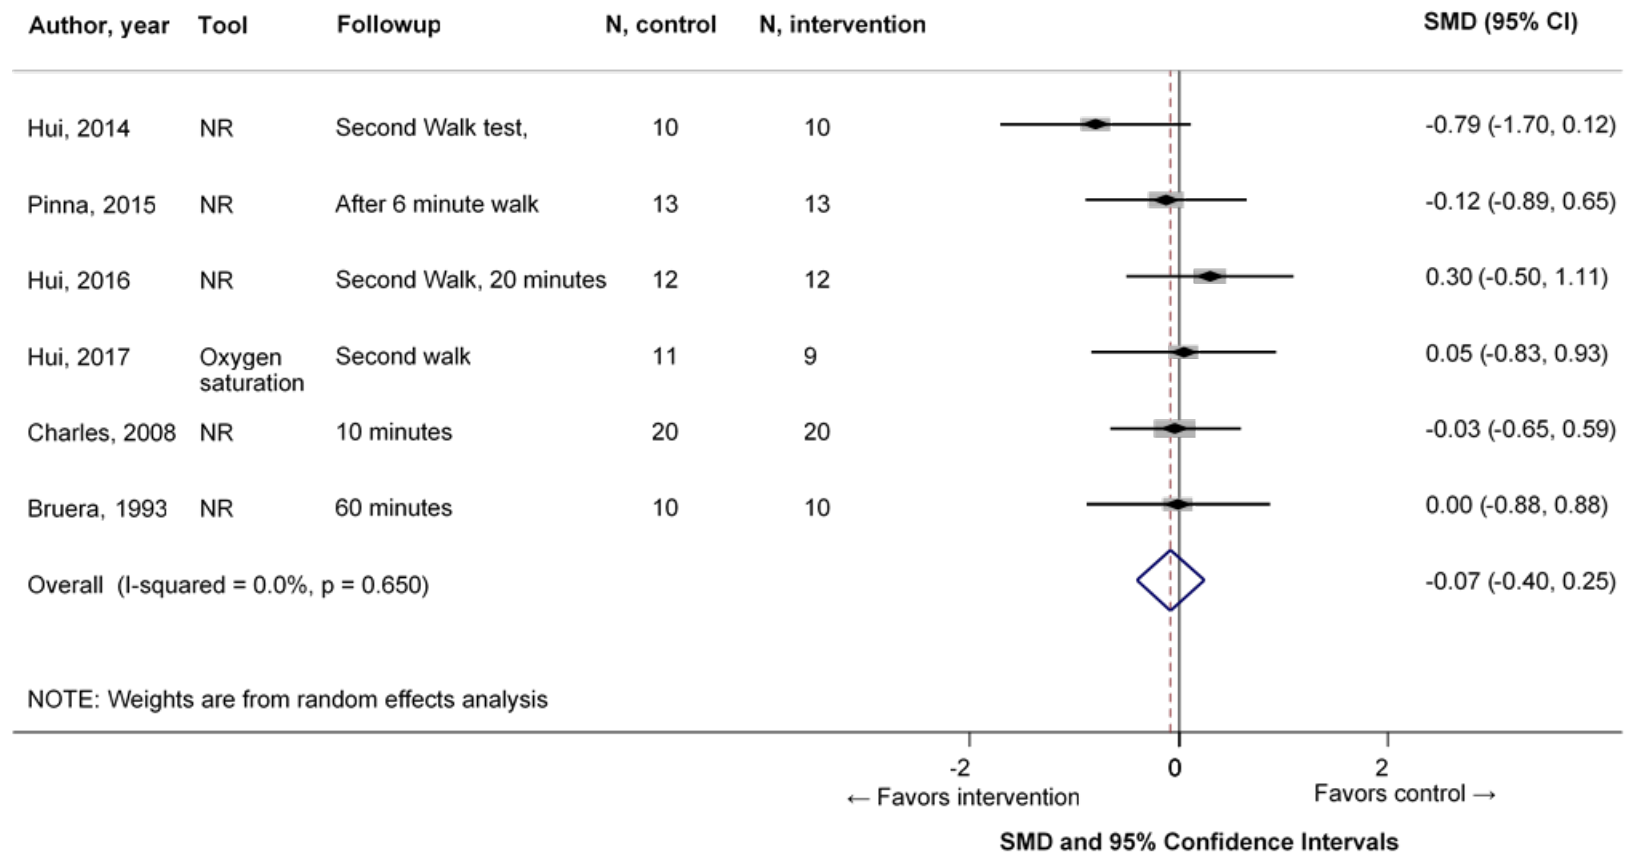

NOTE: Weights are from random effects analysis

CI=confidence interval; N=sample size; NR=not reported; SMD=standardized mean difference

**eFigure 9. Meta-analysis of the effects of placebo vs opioids on oxygen saturation in patients with advanced cancer in inpatient hospice or palliative care units (Charles, 2008 et al.<sup>15</sup> saline vs systemic hydromorphone comparison)**

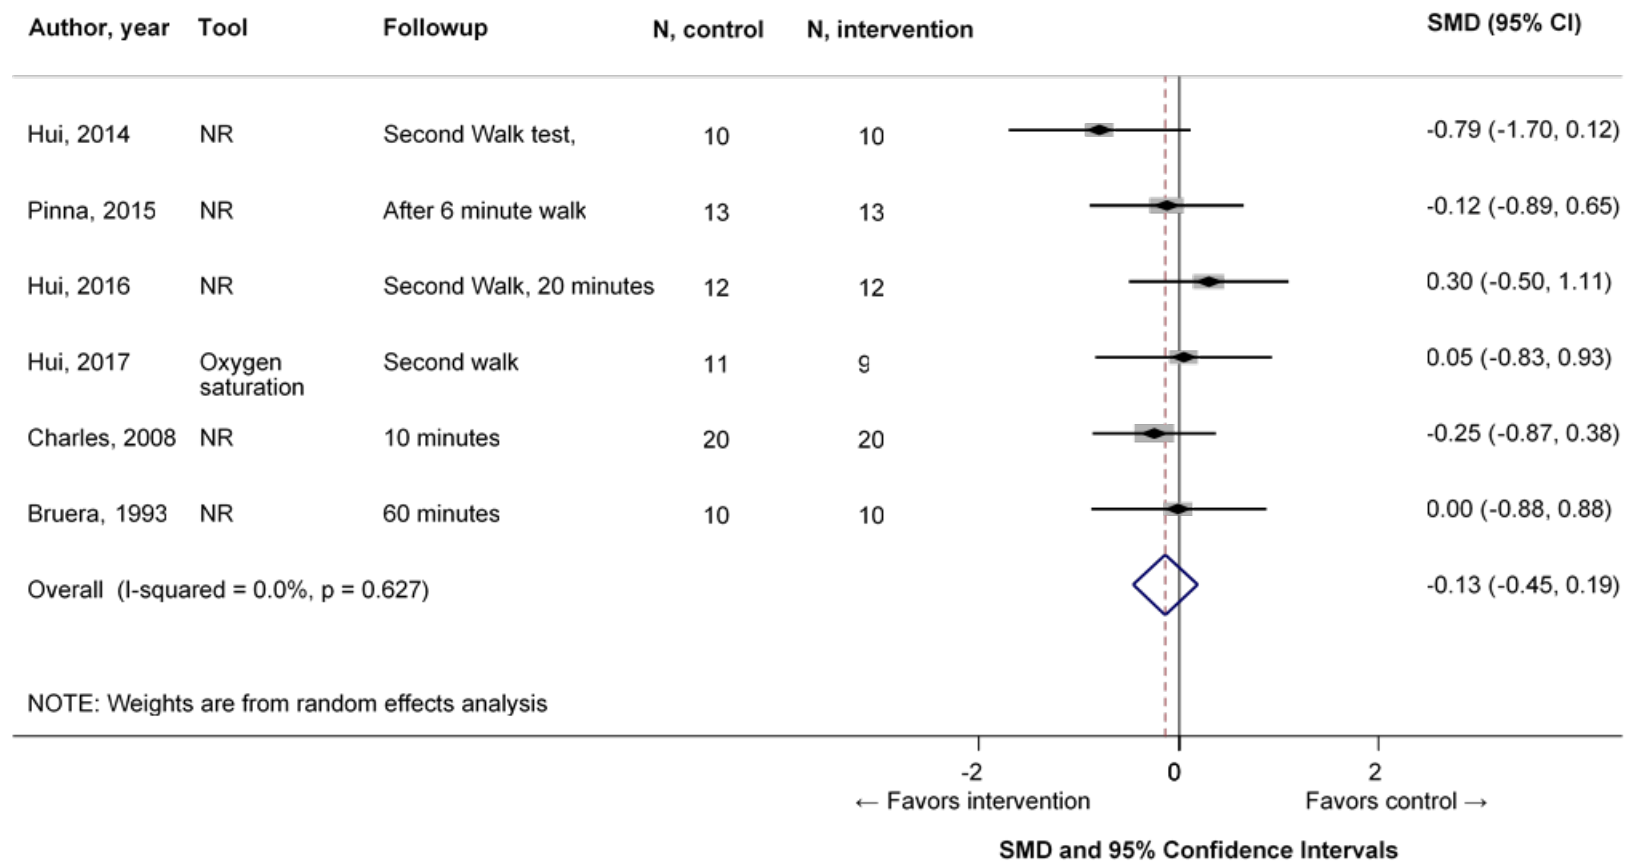

NOTE: Weights are from random effects analysis

CI=confidence interval; N=sample size; NR=not reported; SMD=standardized mean difference



**eFigure 10. Meta-analysis of the effects of opioids vs opioids on oxygen saturation in patients with advanced cancer in inpatient hospice or palliative care units**

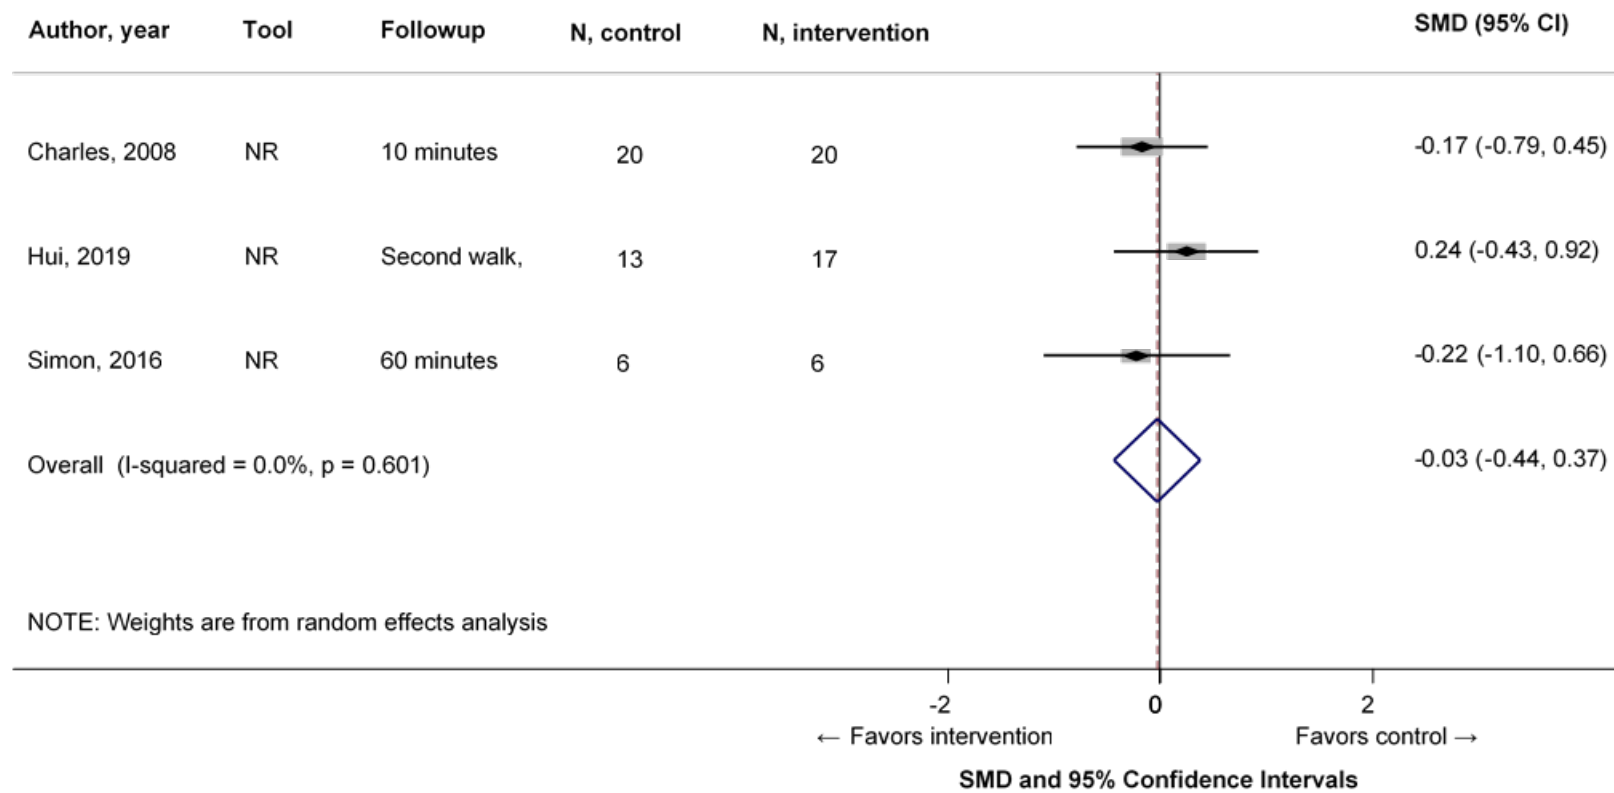

NOTE: Weights are from random effects analysis

CI=confidence interval; N=sample size; NR=not reported; SMD=standardized mean difference

**eFigure 11. Meta-analysis of the effects of placebo vs opioids on respiratory rates in patients with advanced cancer in inpatient hospice or palliative care units (Charles, 2008 et al.<sup>15</sup> saline vs nebulized hydromorphone comparison)**

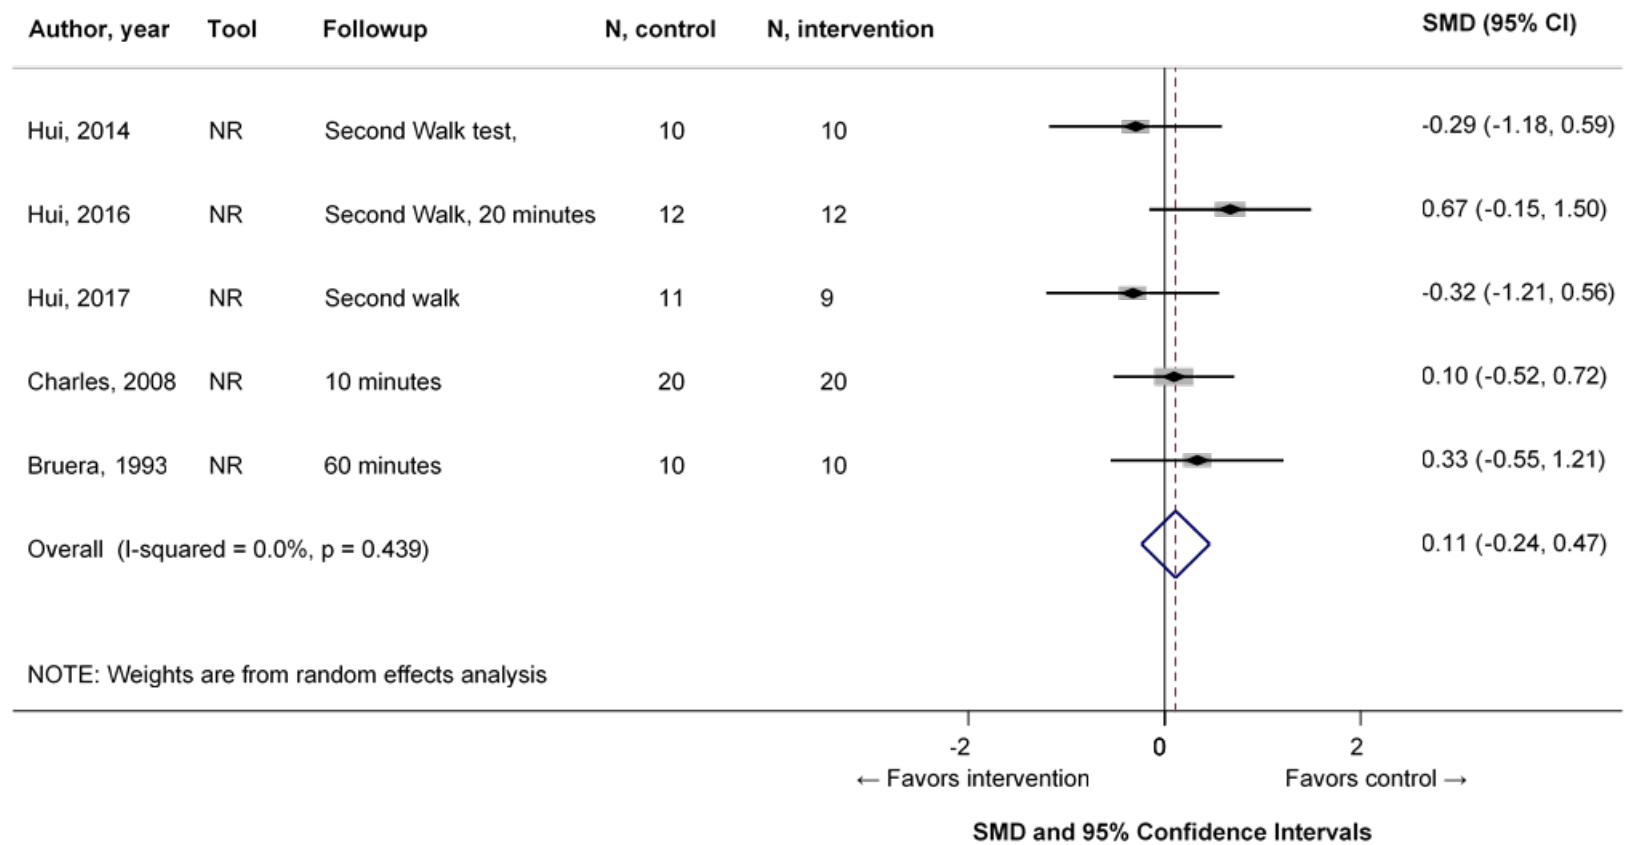

NOTE: Weights are from random effects analysis

CI=confidence interval; N=sample size; NR=not reported; SMD=standardized mean difference

**eFigure 12. Meta-analysis of the effects of placebo vs opioids on respiratory rates in patients with advanced cancer in inpatient hospice or palliative care units (Charles, 2008 et al.<sup>15</sup> saline vs systemic hydromorphone comparison)**

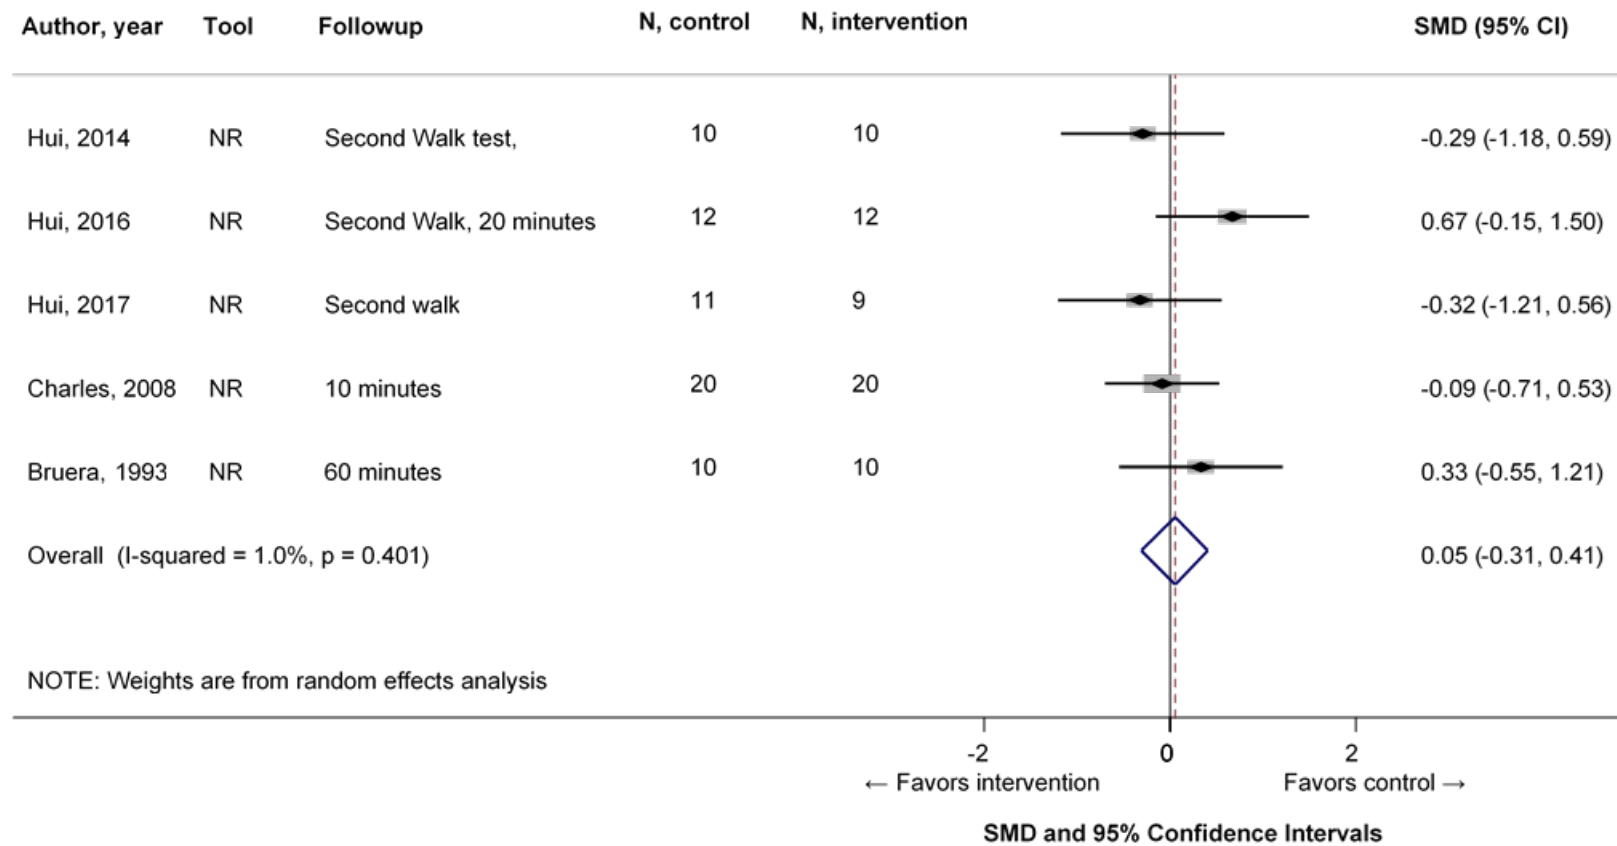

CI=confidence interval; N=sample size; NR=not reported; SMD=standardized mean difference

**eFigure 13. Meta-analysis of the effects of opioids vs opioids on respiratory rates in patients with advanced cancer in inpatient hospice or palliative care units**

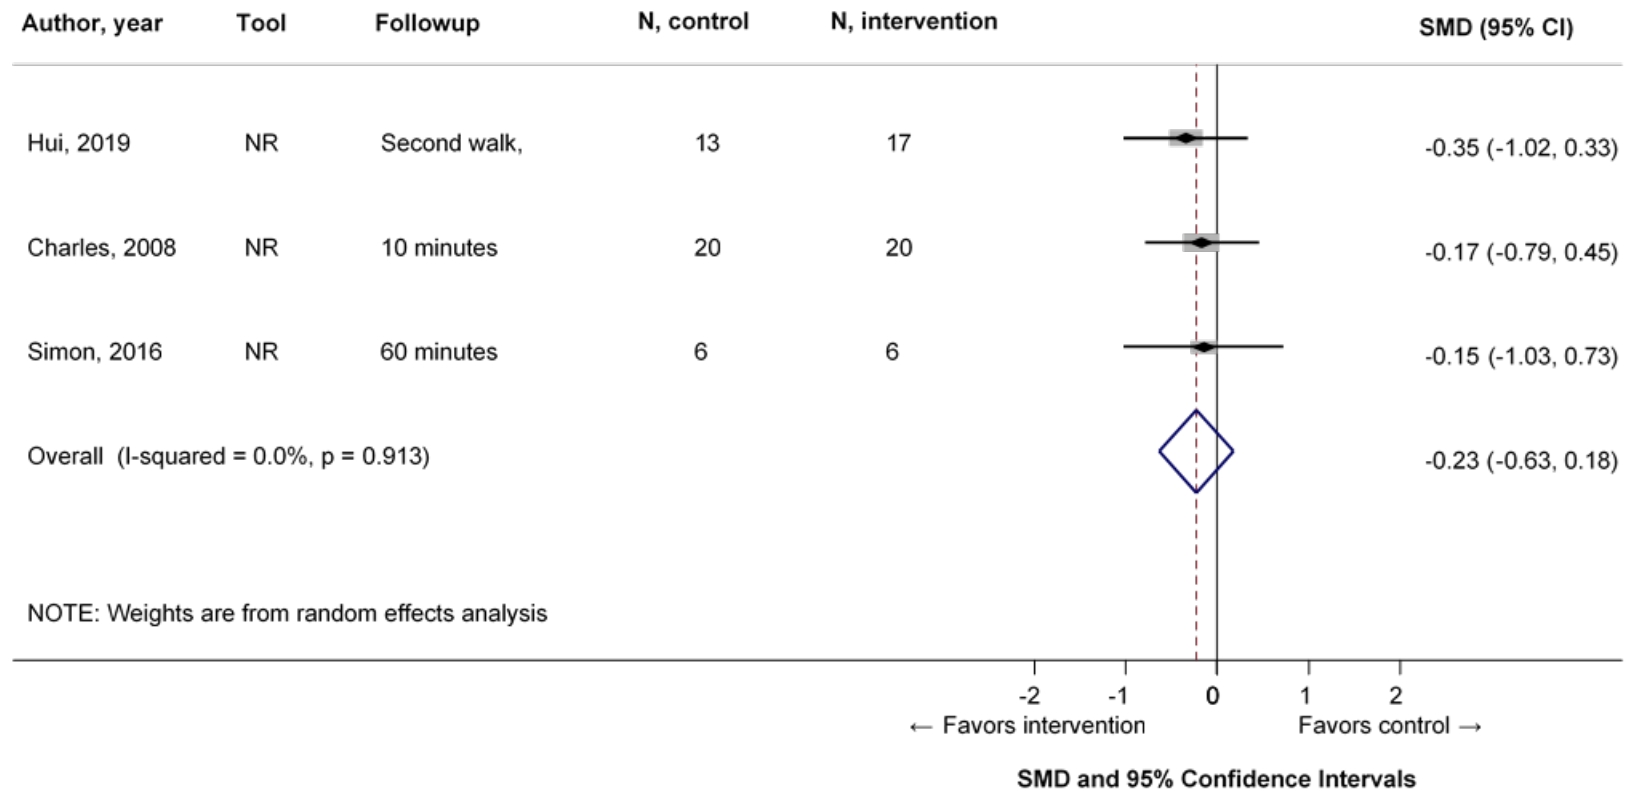

CI=confidence interval; N=sample size; NR=not reported; SMD=standardized mean difference

## Meta-analysis of harms of pharmacological interventions

**eFigure 14. Meta-analysis of the effects of placebo vs opioids on dizziness outcomes in patients with advanced cancer in inpatient hospice or palliative care units**

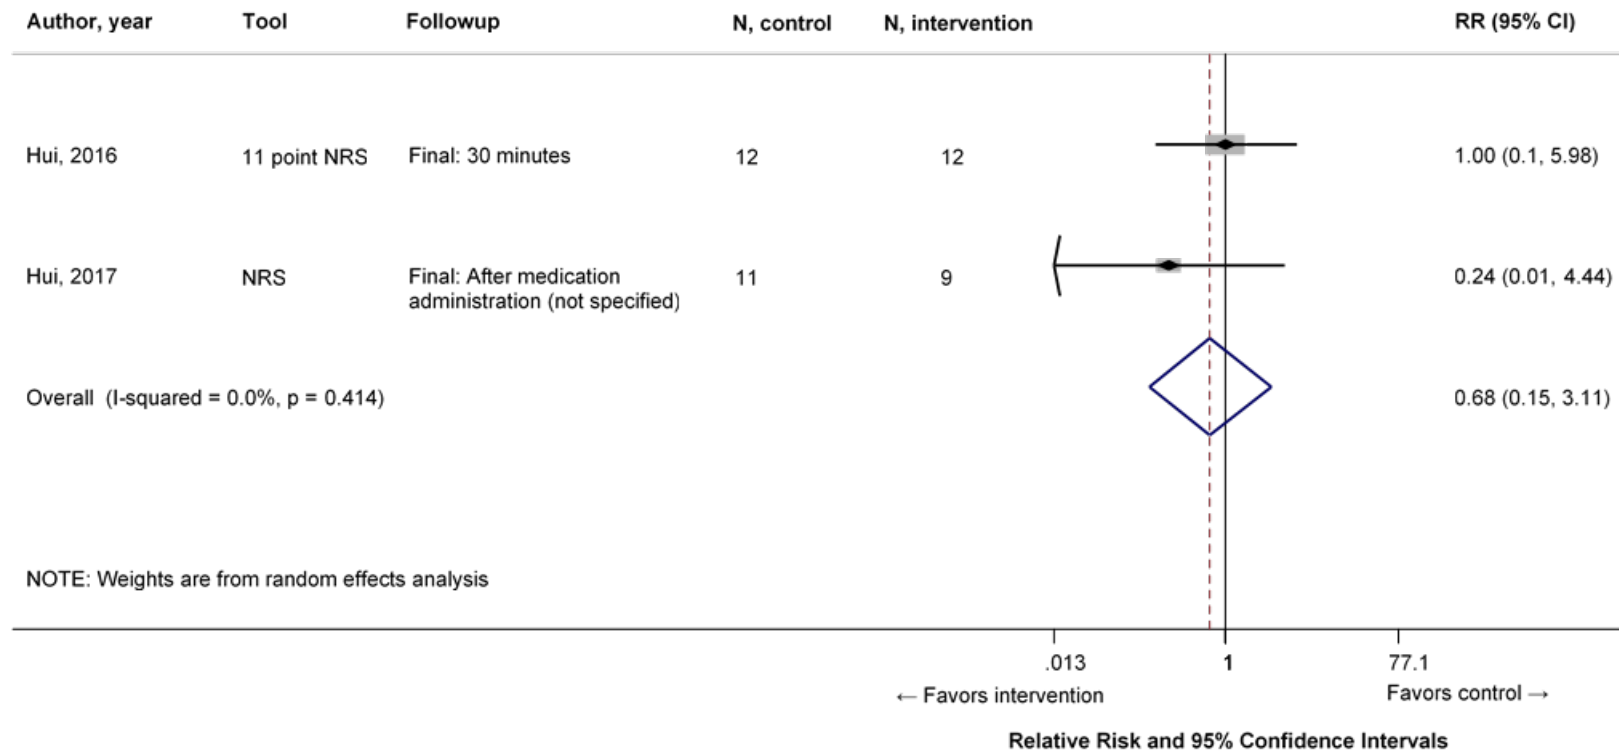

CI=confidence interval; N=sample size; NR=not reported; NRS=Numerical Rating Scale; RR=relative risk

**eFigure 15. Meta-analysis of the effects of placebo vs opioids on drowsiness outcomes in patients with advanced cancer in inpatient hospice or palliative care units**

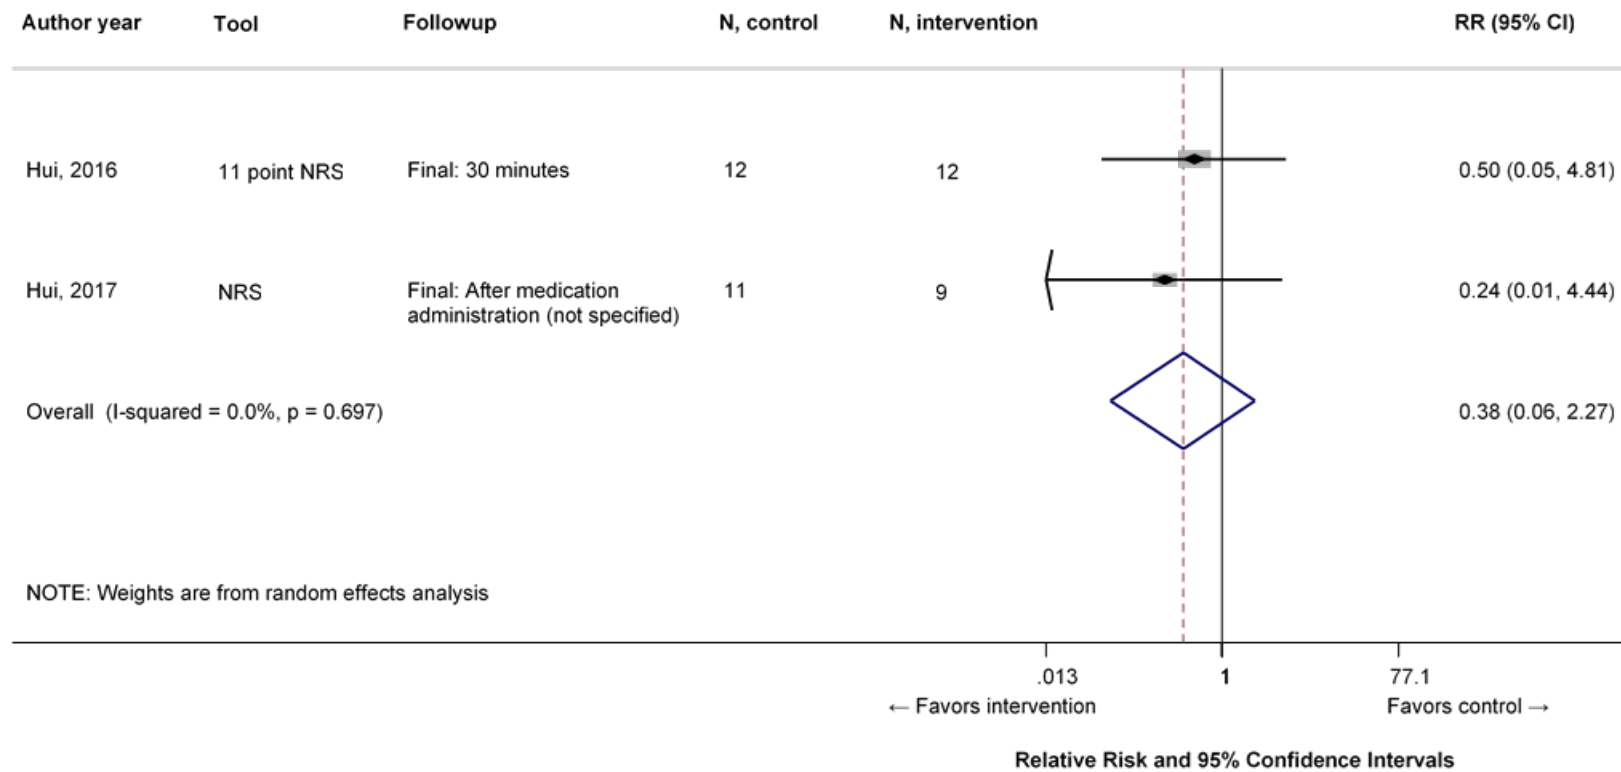

CI=confidence interval; N=sample size; NR=not reported; NRS=Numerical Rating Scale; RR=relative risk

**eFigure 16. Meta-analysis of the effects of placebo vs opioids on fatigue outcomes in patients with advanced cancer in inpatient hospice or palliative care units**

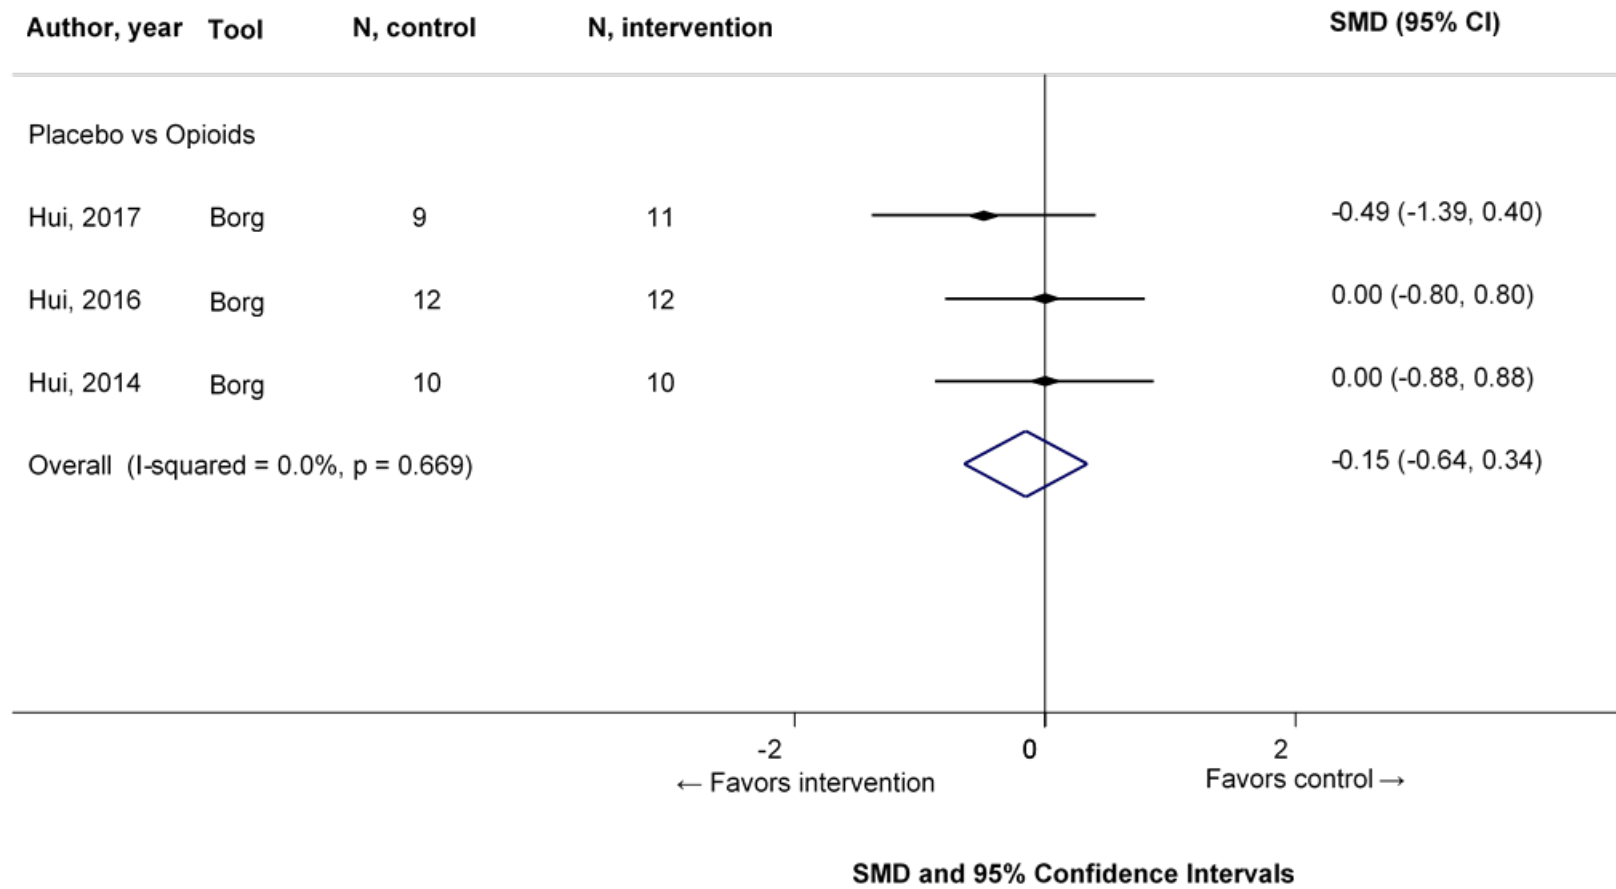

CI=confidence interval; N=sample size; NR=not reported; SMD=standardized mean difference
